# Supplementary material for: Structural studies of Group 1 metal 4-azapentalenyl complexes
Source: Royal Society of Chemistry journal article supplement (doi:10.1039/b500198f), 2005-01-01
Supplement: b500198f.pdf [file b500198f.pdf]

**ELECTRONIC SUPPORTING INFORMATION**

**for**

**Structural studies of Group 1 metal 4-azapentalenyl complexes**

*Michael J. Bermingham,<sup>a</sup> F. Geoffrey N. Cloke,<sup>b</sup> Michael G. Gardiner,<sup>\*a</sup> Peter B. Hitchcock,<sup>b</sup> Lynsey E. Maher,<sup>a</sup> Lauren E. Wise<sup>a</sup> and Brian F. Yates<sup>a</sup>*

a School of Chemistry, University of Tasmania, Private Bag 75, Hobart TAS 7001, Australia.

b Department of Chemistry, School of Life Sciences, The University of Sussex, Brighton BN1 9QJ, UK.

\* To whom correspondence should be addressed. Phone: 61 (0)3 62262404. Fax: 61 (0)3 62262858.

E-mail: Michael.Gardiner@utas.edu.au.

### Synthesis of 5.

Potassium metal (0.50 g, 13 mmol) was added to **4** (1.0 g, 6.4 mmol) in thf (50 mL) and stirred at 25 °C for 3 hours. The red solution was filtered, to remove excess potassium metal and other impurities, and then concentrated *in vacuo* to *ca.* 10 mL. Upon cooling to -25 °C for a week red, crystals of **5** formed (1.36 g, 93%). Anal. Calcd. for C<sub>11</sub>H<sub>8</sub>NK(C<sub>4</sub>H<sub>8</sub>O)<sub>1/2</sub>: C, 67.71; H, 5.25; N, 6.08. Found: C, 67.68; H, 5.29; N, 6.08 %. <sup>1</sup>H NMR (thf-d<sup>8</sup>, 299.898 MHz, 298K, ppm): δ 1.78 (m, 2H, CH<sub>2</sub>), 3.62 (m, 2H, OCH<sub>2</sub>), 5.85 (m, 1H, CH), 5.97 (m, 1H, CH), 6.27 (m, b, 1H, C), 6.58 (m, 1H, CH), 6.71 (m, 1H, CH), 6.76 (m, 1H, CH), 6.71 (m, 1H, CH), 7.35 (m, 1H, CH). <sup>13</sup>C {<sup>1</sup>H} NMR (thf-d<sup>8</sup>, 75.4 MHz, 298K, ppm): δ 83.3 (CH), 83.9 (CH), 98.1 (CH), 105.0 (CH), 109.6 (CH), 110.9 (C), 111.2 (CH), 118.9 (CH), 120.5 (CH), 131.3 (C), 132.2 (C). (resonances for thf not detected by <sup>13</sup>C {<sup>1</sup>H} NMR due to overlap with thf-d<sup>8</sup> resonances).

### Synthesis of 6.

Potassium metal (0.25 g, 6.4 mmol) was added to **4** (0.52 g, 3.3 mmol) in thf (50 mL) and stirred 25 °C at for 12 hours. The red solution was filtered, to remove excess potassium metal and other impurities, and the solvent was removed *in vacuo*. Neat tmen (20 mL) was added and the mixture stirred at ambient temperature for 2 hours, after which time the red solution was filtered from impurities and concentrated *in vacuo* to *ca.* 15 mL. Upon cooling to – 25 °C for a week, red crystals of **6** formed. Anal. Calcd. for C<sub>11</sub>H<sub>8</sub>NK(C<sub>6</sub>H<sub>16</sub>N<sub>2</sub>): C, 65.97; H, 7.82; N, 13.58. Found: C, 66.08; H, 7.58; N, 13.24%. <sup>1</sup>H NMR (py-d<sup>5</sup>, 300.132 MHz, 300K, ppm): δ 2.16 (s, 12H, CH<sub>3</sub>), 2.35 (s, 4H, CH<sub>2</sub>), 6.56 (m, 1H, CH), 6.62 (m, 1H, CH), 6.93 (m, 1H, CH), 7.16 (m, 1H, CH), 7.44 (m, 2H, CH), 7.46 (m, 1H, CH), 8.00 (m, 1H, CH). <sup>13</sup>C{<sup>1</sup>H} NMR (py-d<sup>5</sup>, 75.4677 MHz, 300K, ppm): δ 46.0 (CH<sub>3</sub>), 58.2 (CH<sub>2</sub>), 84.32 (CH), 85.0 (CH), 99.0 (CH), 105.1 (CH), 109.9 (CH), 110.2 (C), 111.4 (CH), 119.4 (CH), 120.6 (CH), 131.5 (C), 132.0 (C).

### Computational details

Full geometry optimisations were carried out with the use of the B3LYP density functional level of theory combined with the 6-31+G(d) basis set. Vibrational frequency calculations at this level of theory confirmed that all the species studied were true minima. Single-point energies on these optimised geometries were calculated at the B3LYP level with the 6-311+G(d,p) basis set. The energies quoted in this paper refer to this final level of theory. All calculations were carried out with the Gaussian 98<sup>1</sup> program.

1) Frisch, M. J.; Trucks, G. W.; Schlegel, H. B.; Scuseria, G. E.; Robb, M. A.; Cheeseman, J. R.; Zakrzewski, V. G.; Montgomery, J. A.; Stratmann, R. E.; Burant, J. C.; Dapprich, S.; Millam, J. M.; Daniels, A. D.; Kudin, K. N.; C, S. M.; Farkas, O.; Tomasi, J.; Barone, V.; Cossi, M.; Cammi, R.; Mennucci, B.; Pomelli, C.; Adamo, C.; Clifford, S.; Otcherski, J.; Petersson, G. A.; Ayala, P. J.; Cui, Q.; Morokuma, K.; Malick, D. K.; Rabuk, A. D.; Raghavachari, K.; Foresman, J. B.; Cioslowski, J.; Ortiz, J. V.; Stefanov, B. B.; Liu, G.; Liashenko, A.; Piskorz, P.; Komaromi, I.; Gomberts, R.; Martin, R. L.; Fox, D. J.; Kieth, T.; Al-Laham, M. A.; Peng, C. Y.; Nanayakkara, A.; Gonzalez, C.; Challacombe, M.; Gill, P. M. W.; Johnson, B. G.; Chen, W.; Wong, M. W.; Andres, J. L.; Head-Gordon, M.; Replogle, E. S.; Pople, J. A. *Gaussian 98 A.1, Revision A.1*; Gaussian, Inc.: Pittsburgh, PA, 1998.

Total Energies (Hartree) for structures 7-12

| Compound                                          | B3LYP/6-31+G(d) <sup>a</sup> | B3LYP/6-311+G(d,p) <sup>b</sup> |
|---------------------------------------------------|------------------------------|---------------------------------|
| C <sub>7</sub> H <sub>6</sub> NLi ( <b>7a</b> )   | -332.623446                  | -332.6994                       |
| C <sub>7</sub> H <sub>6</sub> NLi ( <b>8a</b> )   | -332.616210                  | -332.6914                       |
| C <sub>7</sub> H <sub>6</sub> NNa ( <b>8b</b> )   | -487.383003                  | -487.4619                       |
| C <sub>7</sub> H <sub>6</sub> NK ( <b>8c</b> )    | -925.004198                  | -925.1183                       |
| C <sub>11</sub> H <sub>8</sub> NLi ( <b>9a</b> )  | -486.271562                  | -486.3768                       |
| C <sub>11</sub> H <sub>8</sub> NLi ( <b>11a</b> ) | -486.271610                  | -486.3764                       |
| C <sub>11</sub> H <sub>8</sub> NLi ( <b>12a</b> ) | -486.269481                  | -486.3751                       |
| C <sub>11</sub> H <sub>8</sub> NNa ( <b>10b</b> ) | -641.035319                  | -641.1433                       |
| C <sub>11</sub> H <sub>8</sub> NNa ( <b>12b</b> ) | -641.031037                  | -641.1398                       |
| C <sub>11</sub> H <sub>8</sub> NK ( <b>10c</b> )  | -1078.656833                 | -1078.7994                      |

<sup>a</sup> Geometry optimised at this level of theory.

<sup>b</sup> Single point energy on geometry optimised at B3LYP/6-31+G(d).

Optimised B3LYP/6-31+G(d) Gas-Phase Geometries (Å) for structures 7-12

**7a**

|    |           |           |           |
|----|-----------|-----------|-----------|
| C  | 0.065394  | 0.757168  | -0.107318 |
| N  | 0.062476  | -0.661486 | -0.092161 |
| C  | -1.260165 | -1.147176 | -0.096394 |
| C  | 1.366458  | -1.134369 | -0.037228 |
| C  | -2.096552 | -0.016780 | -0.183986 |
| C  | 2.195038  | -0.014658 | -0.003488 |
| C  | -1.312844 | 1.165612  | -0.131879 |
| C  | 1.412290  | 1.166660  | -0.029665 |
| H  | -1.479076 | -2.197436 | -0.218209 |
| H  | 1.587433  | -2.191528 | -0.043657 |
| H  | -3.177259 | -0.060313 | -0.250852 |
| H  | 3.277437  | -0.055021 | 0.029534  |
| H  | -1.674834 | 2.181882  | -0.205061 |
| H  | 1.772053  | 2.186397  | -0.028413 |
| Li | -0.986933 | 0.035893  | 1.633841  |

**8a**

|    |           |           |           |
|----|-----------|-----------|-----------|
| C  | 0.509355  | -0.617281 | 0.000000  |
| N  | 0.000000  | 0.706276  | 0.000000  |
| C  | -0.360135 | 1.079241  | 1.306460  |
| C  | -0.360135 | 1.079241  | -1.306460 |
| C  | -0.016190 | 0.001851  | 2.132870  |
| C  | -0.016190 | 0.001851  | -2.132870 |
| C  | 0.497962  | -1.062668 | 1.353481  |
| C  | 0.497962  | -1.062668 | -1.353481 |
| H  | -0.670961 | 2.086398  | 1.542085  |
| H  | -0.670961 | 2.086398  | -1.542085 |
| H  | -0.113818 | 0.005661  | 3.212375  |
| H  | -0.113818 | 0.005661  | -3.212375 |
| H  | 0.834972  | -2.025920 | 1.710864  |
| H  | 0.834972  | -2.025920 | -1.710864 |
| Li | -1.538718 | -0.531202 | 0.000000  |

**8b**

|    |           |           |           |
|----|-----------|-----------|-----------|
| C  | 0.844043  | -0.310583 | 0.000000  |
| N  | 0.000000  | 0.823571  | 0.000000  |
| C  | -0.420382 | 1.108847  | 1.305963  |
| C  | -0.420382 | 1.108847  | -1.305963 |
| C  | 0.205062  | 0.171454  | 2.137246  |
| C  | 0.205062  | 0.171454  | -2.137246 |
| C  | 0.969329  | -0.732568 | 1.354636  |
| C  | 0.969329  | -0.732568 | -1.354636 |
| H  | -0.974426 | 2.006727  | 1.539712  |
| H  | -0.974426 | 2.006727  | -1.539712 |
| H  | 0.140590  | 0.174410  | 3.219650  |
| H  | 0.140590  | 0.174410  | -3.219650 |
| H  | 1.582950  | -1.546247 | 1.717921  |
| H  | 1.582950  | -1.546247 | -1.717921 |
| Na | -1.419144 | -1.067643 | 0.000000  |



**8c**

|   |           |           |           |
|---|-----------|-----------|-----------|
| C | 1.067926  | 0.075802  | 0.000000  |
| N | 0.000000  | 0.996778  | 0.000000  |
| C | -0.453468 | 1.205891  | 1.306902  |
| C | -0.453468 | 1.205891  | -1.306902 |
| C | 0.376795  | 0.445171  | 2.140909  |
| C | 0.376795  | 0.445171  | -2.140909 |
| C | 1.306253  | -0.283755 | 1.356089  |
| C | 1.306253  | -0.283755 | -1.356089 |
| H | -1.175307 | 1.976049  | 1.540633  |
| H | -1.175307 | 1.976049  | -1.540633 |
| H | 0.330913  | 0.455096  | 3.224438  |
| H | 0.330913  | 0.455096  | -3.224438 |
| H | 2.092924  | -0.932397 | 1.719088  |
| H | 2.092924  | -0.932397 | -1.719088 |
| K | -1.245241 | -1.412497 | 0.000000  |

**9a**

|    |           |           |           |
|----|-----------|-----------|-----------|
| C  | 0.000000  | 0.000000  | 0.000000  |
| N  | 0.000000  | 0.000000  | 1.414374  |
| C  | 1.296041  | 0.000000  | 1.920299  |
| C  | 2.157023  | -0.004442 | 0.809461  |
| C  | 1.365305  | 0.010328  | -0.407655 |
| C  | -1.365450 | 0.057007  | -0.419348 |
| C  | -2.159234 | 0.051855  | 0.755327  |
| C  | -1.314945 | 0.062427  | 1.888304  |
| C  | 3.574570  | -0.015978 | 0.696023  |
| C  | 4.155698  | -0.008097 | -0.557980 |
| C  | 3.372435  | 0.009051  | -1.744956 |
| C  | 1.988457  | 0.014914  | -1.671337 |
| H  | -1.722728 | 0.023573  | -1.439376 |
| H  | -3.241573 | 0.046613  | 0.794951  |
| H  | -1.544964 | -0.029716 | 2.939346  |
| H  | 1.488440  | -0.046227 | 2.981470  |
| H  | 4.194238  | -0.033707 | 1.590075  |
| H  | 5.240273  | -0.018794 | -0.642568 |
| H  | 3.865985  | 0.009718  | -2.713242 |
| H  | 1.388792  | 0.016317  | -2.579758 |
| Li | -0.922215 | 1.800974  | 0.728711  |

**11a**

|    |           |           |           |
|----|-----------|-----------|-----------|
| C  | 0.000000  | 0.000000  | 0.000000  |
| C  | 0.000000  | 0.000000  | 1.408021  |
| C  | 1.355852  | 0.000000  | -0.402368 |
| C  | 2.173908  | -0.023844 | 0.730919  |
| C  | -0.808842 | -0.013015 | 2.605312  |
| C  | 1.443014  | -0.176178 | 3.246307  |
| C  | 0.107350  | -0.050641 | 3.732577  |
| C  | -2.202192 | 0.021044  | 2.816910  |
| C  | -2.696225 | 0.032035  | 4.114783  |
| C  | -1.807650 | 0.011448  | 5.219083  |
| C  | -0.433489 | -0.033502 | 5.046615  |
| N  | 1.344534  | -0.028527 | 1.830396  |
| H  | 2.370528  | 0.047278  | 3.753581  |
| H  | 3.249486  | -0.030046 | 0.832502  |
| H  | 1.716811  | 0.024509  | -1.423309 |
| H  | -0.869750 | 0.029289  | -0.642053 |
| H  | -3.768305 | 0.068941  | 4.287220  |
| H  | -2.880964 | 0.059072  | 1.967664  |
| H  | 0.230003  | -0.041042 | 5.908525  |
| H  | -2.215416 | 0.037637  | 6.227030  |
| Li | 0.442488  | -1.833461 | 2.521645  |

**12a**

|    |           |           |           |
|----|-----------|-----------|-----------|
| C  | 0.000000  | 0.000000  | 0.000000  |
| C  | 0.000000  | 0.000000  | 1.412467  |
| C  | 1.324860  | 0.000000  | -0.455126 |
| C  | 1.347154  | 0.000584  | 1.810507  |
| N  | 2.131866  | 0.000880  | 0.649090  |
| C  | 2.252275  | 0.005062  | 2.917154  |
| C  | 3.502439  | -0.008372 | 0.948612  |
| C  | 3.622003  | 0.004849  | 2.327388  |
| C  | 2.080082  | 0.007343  | 4.305269  |
| C  | 3.201689  | -0.040057 | 5.167929  |
| C  | 4.515752  | -0.033667 | 4.613816  |
| C  | 4.733876  | -0.031147 | 3.233581  |
| H  | 1.729482  | 0.004382  | -1.457080 |
| H  | -0.874330 | 0.004046  | -0.639232 |
| H  | -0.865384 | 0.008894  | 2.061722  |
| H  | 4.251877  | -0.000316 | 0.171336  |
| H  | 1.077773  | 0.014316  | 4.728262  |
| H  | 5.750596  | -0.040016 | 2.848352  |
| H  | 5.371475  | -0.055762 | 5.283869  |
| H  | 3.064434  | -0.033116 | 6.244010  |
| Li | 3.376576  | -1.711750 | 3.818670  |

**10b**

|    |           |           |           |
|----|-----------|-----------|-----------|
| C  | 0.000000  | 0.000000  | 0.000000  |
| N  | 0.000000  | 0.000000  | 1.401789  |
| C  | 1.334476  | 0.000000  | 1.918255  |
| C  | 2.166784  | 0.239085  | 0.781039  |
| C  | 1.364346  | 0.192353  | -0.421724 |
| C  | -1.275595 | -0.425705 | -0.425504 |
| C  | -2.050939 | -0.619033 | 0.751086  |
| C  | -1.250873 | -0.360489 | 1.867379  |
| C  | 3.559348  | 0.467661  | 0.654840  |
| C  | 4.121473  | 0.584994  | -0.609571 |
| C  | 3.336228  | 0.490281  | -1.782908 |
| C  | 1.959783  | 0.299784  | -1.688862 |
| H  | -1.619662 | -0.507832 | -1.447995 |
| H  | -3.103243 | -0.874858 | 0.786108  |
| H  | -1.476596 | -0.384358 | 2.924145  |
| H  | 1.505485  | 0.348480  | 2.929474  |
| H  | 4.184132  | 0.545064  | 1.542409  |
| H  | 5.191579  | 0.758981  | -0.701089 |
| H  | 3.807482  | 0.585631  | -2.757482 |
| H  | 1.347708  | 0.256761  | -2.587904 |
| Na | 0.723137  | -2.219870 | 0.894003  |

**12b**

|    |           |           |           |
|----|-----------|-----------|-----------|
| C  | 0.000000  | 0.000000  | 0.000000  |
| C  | 0.000000  | 0.000000  | 1.413654  |
| C  | 1.324051  | 0.000000  | -0.455483 |
| C  | 1.348759  | 0.007170  | 1.812710  |
| N  | 2.132659  | 0.001832  | 0.650848  |
| C  | 2.254956  | -0.012380 | 2.920753  |
| C  | 3.503410  | -0.044913 | 0.951101  |
| C  | 3.619169  | -0.021204 | 2.338208  |
| C  | 2.079157  | -0.085294 | 4.307946  |
| C  | 3.195872  | -0.187308 | 5.163074  |
| C  | 4.509298  | -0.144451 | 4.614704  |
| C  | 4.731297  | -0.055588 | 3.240656  |
| H  | 4.253405  | 0.021887  | 0.176608  |
| H  | 1.729097  | 0.004710  | -1.457345 |
| H  | -0.874586 | 0.010743  | -0.639205 |
| H  | -0.865425 | 0.018327  | 2.062943  |
| H  | 5.748214  | -0.008359 | 2.855916  |
| H  | 1.075445  | -0.070555 | 4.729893  |
| H  | 3.057853  | -0.218093 | 6.239853  |
| H  | 5.363603  | -0.164545 | 5.288324  |
| Na | 3.298826  | -2.253942 | 3.465584  |

**10c**

|   |           |           |           |
|---|-----------|-----------|-----------|
| C | 0.000000  | 0.000000  | 0.000000  |
| N | 0.000000  | 0.000000  | 1.401644  |
| C | 1.318408  | 0.000000  | 1.918950  |
| C | 2.169727  | 0.142528  | 0.795056  |
| C | 1.370975  | 0.100246  | -0.416494 |
| C | -1.307663 | -0.325380 | -0.427419 |
| C | -2.089147 | -0.481133 | 0.746291  |
| C | -1.269570 | -0.295073 | 1.867777  |
| C | 3.577343  | 0.285956  | 0.669671  |
| C | 4.151587  | 0.332876  | -0.591940 |
| C | 3.367908  | 0.250818  | -1.770389 |
| C | 1.982901  | 0.141991  | -1.681229 |
| H | -1.658661 | -0.369562 | -1.450136 |
| H | -3.157053 | -0.662617 | 0.783107  |
| H | -1.506228 | -0.273925 | 2.922555  |
| H | 1.499296  | 0.283977  | 2.947224  |
| H | 4.200939  | 0.356496  | 1.558969  |
| H | 5.230618  | 0.442334  | -0.681003 |
| H | 3.849917  | 0.293530  | -2.743601 |
| H | 1.375632  | 0.111217  | -2.584567 |
| K | 0.502124  | -2.623443 | 0.838456  |

Atom labelling diagram for the crystal structure of 5



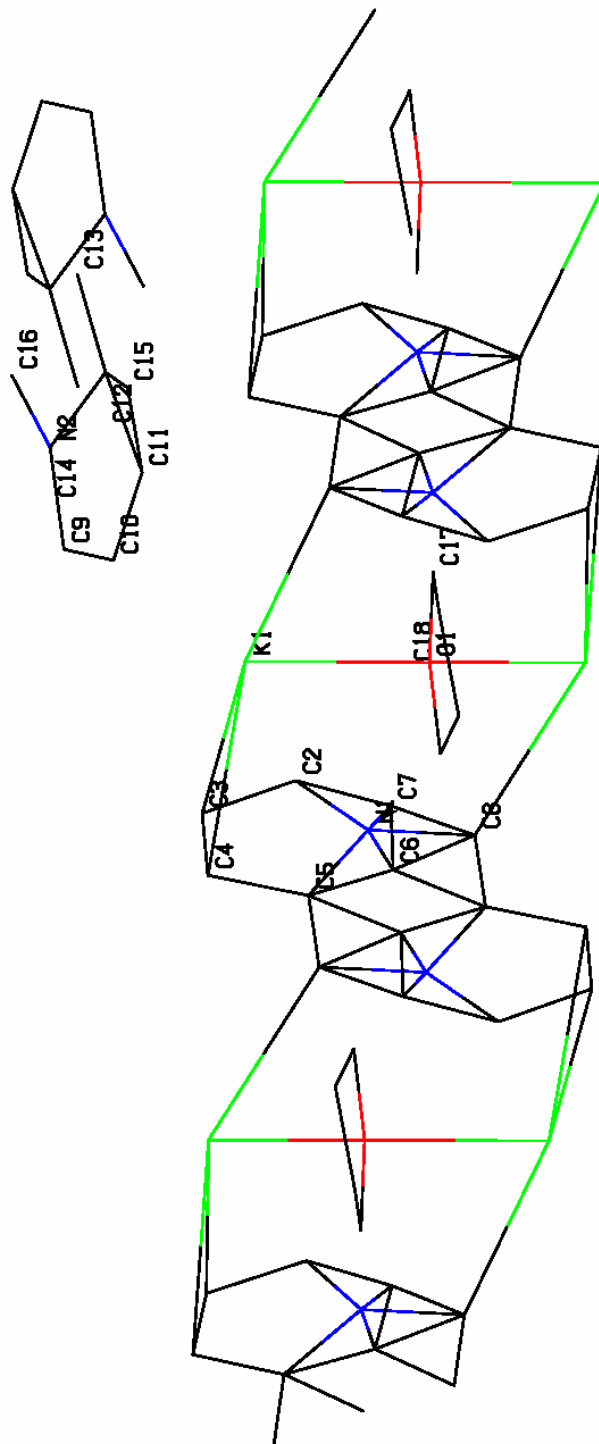

PLATON-Dec 08 16:21.

Atom labelling diagram for the crystal structure of 6

K.Trkk from THF

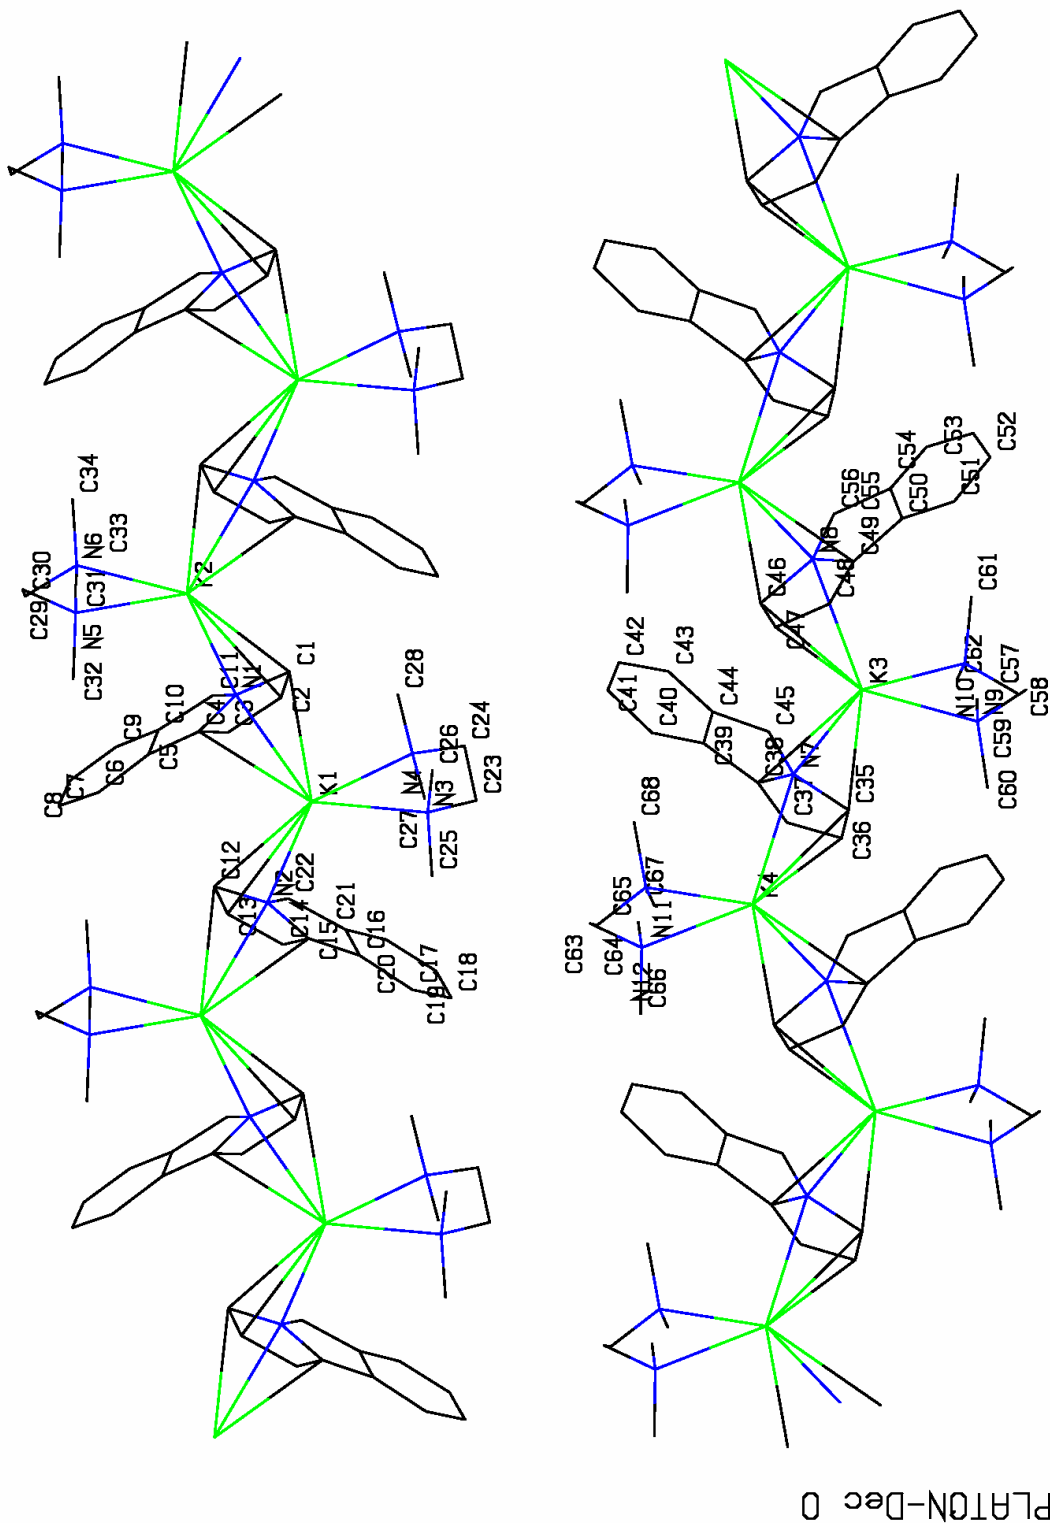

PLATON-Dec 0

Jul 17 00 Ln P -1
